# Supplementary material for: Monte Carlo simulated correction factors for high dose rate brachytherapy postal dosimetry audit methodology
Source: PubMed Central journal article supplement (PMC11554633; doi:10.1016/j.phro.2024.100657), 2024-10-22
Supplement: mmc2.pdf [file mmc2.pdf]

Supplementary Table 2. Characteristics of all  $^{192}\text{Ir}$  and  $^{60}\text{Co}$  HDR sources [25] used in simulations.  $A$  is the dose-rate constant in water according to TG-43.

| Manufacturer | Source model      | Radioactive isotope | Source Length (mm) | Source Diameter (mm) | $\Lambda$ ( $\text{cm}^{-2}$ ) | Capsule material     | Capsule diameter (mm) | Capsule density ( $\text{g}/\text{cm}^3$ ) |
|--------------|-------------------|---------------------|--------------------|----------------------|--------------------------------|----------------------|-----------------------|--------------------------------------------|
| BEBIG        | GI192M11          | $^{192}\text{Ir}$   | 3.50               | 0.60                 | 1.110                          | 316L stainless steel | 1.00                  | 7.8                                        |
| BEBIG        | Ir2.A85-2         | $^{192}\text{Ir}$   | 3.50               | 0.60                 | 1.109                          | 316L stainless steel | 0.90                  | 7.8                                        |
| Elekta       | Flexisource       | $^{192}\text{Ir}$   | 3.50               | 0.60                 | 1.113                          | 304 stainless steel  | 0.85                  | 8.0                                        |
| Nucletron    | microSelectron-v1 | $^{192}\text{Ir}$   | 3.50               | 0.60                 | 1.116                          | 316L stainless steel | 1.10                  | 7.8                                        |
| Varian       | GammaMed Plus     | $^{192}\text{Ir}$   | 3.50               | 0.70                 | 1.117                          | 316L stainless steel | 0.90                  | 7.8                                        |
| BEBIG        | Co0.A86           | $^{60}\text{Co}$    | 3.50               | 0.50                 | 1.092                          | 316L stainless steel | 1.00                  | 7.8                                        |
